# Supplementary material
Source: publisher figshare collection journal article supplement (https://karger.figshare.com/ndownloader/files/12418244)
Supplement: Supplementary file 1 [file 12418244]

Supplementary Table 1. Baseline categorical and continuous variables in responders and lost patients.

|  | Enrolled (n=187) | Lost  (n=41) | Responders (n=146) |  |
| --- | --- | --- | --- | --- |
| N (%) | n (%) | n (%) | *p* |
| Gender |  |  |  | 0.816a |
| Male | 125 (67.8) | 25 (61) | 100 (68.5) |  |
| Female | 62 (32.2) | 16 (39) | 46 (31.5) |  |
| Education (years) |  |  |  | 0.489b |
| <6 | 12 (6.4) | 3 (7.3) | 9 (6.2) |  |
| 6–8 | 96 (51.3) | 19 (46.3) | 77 (52.7) |  |
| 9–13 | 69 (36.9) | 15 (36.6) | 54 (37.0) |  |
| >13 | 10 (5.3) | 4 (9.7) | 6 (4.1) |  |
| Marital status |  |  |  | 0.188b |
| Single | 62 (33.2) | 15 (36.6) | 47 (32.2) |  |
| Married/partnered | 55 (29.4) | 10 (24.4) | 45 (30.8) |  |
| Separated/divorced | 65 (34.8) | 13 (31.7) | 52 (35.6) |  |
| Widowed | 5 (2.7) | 3 (7.3) | 2 (1.4) |  |
| Living condition |  |  |  | 0.284b |
| Alone | 49 (26.2) | 9 (21.9) | 40 (27.4) |  |
| With partner | 61 (32.6) | 15 (36.6) | 46 (31.5) |  |
| With parents | 59 (31.6) | 10 (24.4) | 49 (33.6) |  |
| With children | 6 (3.2) | 2 (4.9) | 4 (2.7) |  |
| With friends | 12 (6.4) | 5 (12.2) | 7 (4.8) |  |
| Employment |  |  |  | 0.469 |
| Employed | 86 (46) | 24 (58.5) | 62 (42.5) |  |
| Unemployed | 69 (36.9) | 12 (29.2) | 57 (39.0) |  |
| Disability pension | 11 (5.9) | 1 (2.4) | 10 (6.8) |  |
| Retired | 16 (8.6) | 3 (7.3) | 13 (8.9) |  |
| Housewife | 5 (2.7) | 1 (2.4) | 4 (2.7) |  |
| Previous detoxifications |  |  |  | 0.807b |
| 0 | 100 (53.5%) | 20 (48.8%) | 80 (54.8%) |  |
| 1 | 61 (32.6%) | 16 (39%) | 45 (30.8%) |  |
| 2 | 21 (11.2%) | 4 (9.8%) | 17 (11.6%) |  |
| >2 | 5 (2.7%) | 1 (2.4%) | 4 (2.7%) |  |
|  |  |  |  |  |
|  | Mean (SD) | Mean (SD) | Mean (SD) | *p* |
| Age (years) | 46.4 (9.4) | 45.6 (9.3) | 46.6 (9.5) | 0.551c |
| Age at onset of alcohol use (years) | 18.1 (6.4) | 18.3 (6.8) | 18.0 (6.3) | 0.749d |
| Age at onset of alcohol abuse (years) | 32.1 (11.3) | 31 (11.7) | 32.4 (11.3) | 0.376d |
| Length of hospitalization | 28.0 (7.7) | 27.8 (7.6) | 28.1 (7.6) | 0.751 d |
| AUDIT total score | 27.5 (6.4) | 28.2 (5.1) | 27.3 (6.7) | 0.710d |
| STAY-S | 41.3 (12.9) | 40.1(13) | 41.6 (12.9) | 0.525d |
| STAY-T | 58.2 (11.2) | 58.6 (10.6) | 58.1 (11.4) | 0.828c |
| BDI | 19.1 (10.8) | 20 (12.5) | 18.9 (10.3) | 0.837d |
|  |  |  |  |  |

aPearson’s χ2 test

bFisher’s Exact test

cStudent’s t-test

dMann-Whitney U test
